# Supplementary material
Source: Copernicus journal article supplement (doi:10.5194/acp-26-8753-2026)
Supplement: Supplementary file 1 [file acp-26-8753-2026-supplement.pdf]

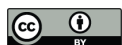

*Supplement of*

## **Critical role of dust induced electrostatic coagulation in the evolution of aerosol size distributions in the atmosphere**

**Luoqiu Quan et al.**

*Correspondence to:* Xiaohui Lu ([luxiaohui@fudan.edu.cn](mailto:luxiaohui@fudan.edu.cn)) and Xiaofei Wang ([xiaofeiwang@fudan.edu.cn](mailto:xiaofeiwang@fudan.edu.cn))

The copyright of individual parts of the supplement might differ from the article licence.

13  
14  
15  
16  
17  
18  
19  
20  
21  
22  
23  
24  
25  
26  
27  
28  
29  
30  
31  
32  
33  
34  
35  
36  
37  
38  
39  
40  
41  
42

**This file includes 13 Figures and 5 Tables:**

**Supplementary Figure S1.** Schematic drawing of the experimental setup for dust aerosol measurement.

**Supplementary Figure S2.** Experimental setup for measuring the charged fraction of dust aerosols.

**Supplementary Figure S3.** Charged fractions of the eight dust aerosol samples.

**Supplementary Figure S4.** Experimental setup for measuring the electrical mobility diameter of ambient aerosols.

**Supplementary Figure S5.** Electrical mobility data for the eight dust aerosol samples.

**Supplementary Figure S6.** Evolution of the particle charge distribution during electrostatic coagulation in a dust-only aerosol system at 25 °C with an initial number concentration of 50 #/cm<sup>3</sup>.

**Supplementary Figure S7.** Evolution of the particle charge distribution during electrostatic coagulation in a dust-only aerosol system at 25 °C with an initial number concentration of 100 #/cm<sup>3</sup>.

**Supplementary Figure S8.** Evolution of the particle charge distribution during electrostatic coagulation in a dust-only aerosol system at 25 °C with an initial number concentration of 200 #/cm<sup>3</sup>.

**Supplementary Figure S9.** Evolution of the particle charge distribution during electrostatic coagulation in a dust-only aerosol system at 25 °C with an initial number concentration of 300 #/cm<sup>3</sup>.

**Supplementary Figure S10.** Evolution of the particle charge distribution during electrostatic coagulation in a dust-only aerosol system at 25 °C with an initial number concentration of 500 #/cm<sup>3</sup>.

**Supplementary Figure S11.** Evolution of the particle charge distribution during electrostatic coagulation in a dust-only aerosol system at 25 °C with an initial number concentration of 1000 #/cm<sup>3</sup>.

43 **Supplementary Figure S12.** Evolution of the particle size distribution (PSD) during  
44 electrostatic coagulation in a dust-only aerosol system at 25 °C with an initial number  
45 concentration of 2000 #/cm<sup>3</sup>.

46 **Supplementary Figure S13.** Evolution of the particle charge distribution during  
47 electrostatic coagulation in a dust-only aerosol system at 25 °C with an initial number  
48 concentration of 2000 #/cm<sup>3</sup>.

49 **Table S1.** Soil sampling locations and soil textures.

50 **Table S2.** DMA operating electrical mobility  $Z_p$  set points for selecting dust aerosols  
51 with specific electrical mobilities.

52 **Table S3.** Ambient particles locations.

53 **Table S4.** Boltzmann equilibrium charge-state probabilities ( $z = -6$  to  $+6 e$ ).

54 **Table S5.** Size-bin edges (sorted in ascending order by column).

55

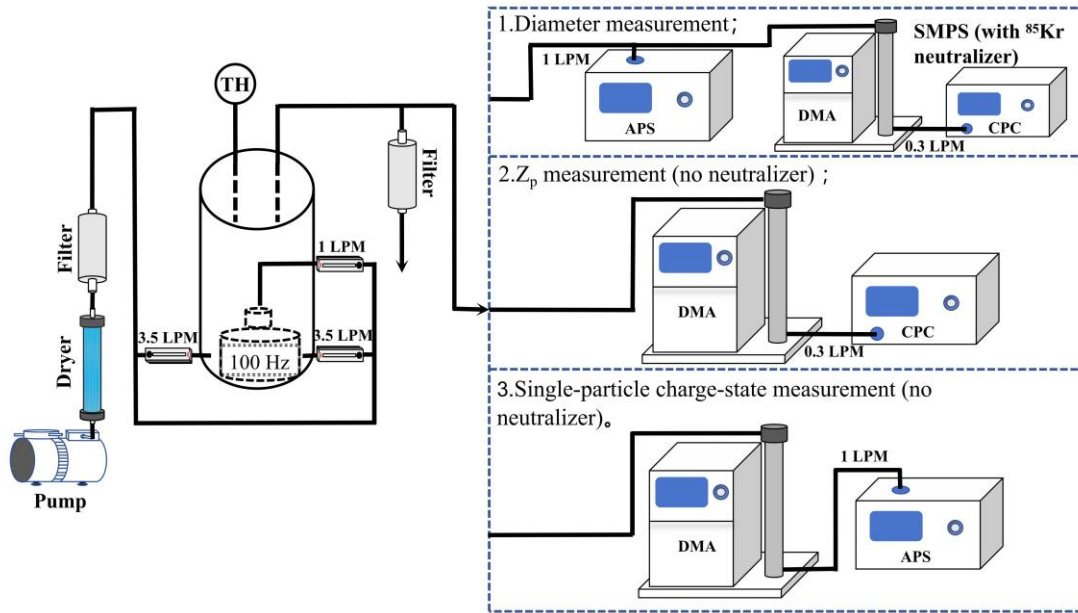

56

57 **Figure S1.** Schematic drawing of the experimental setup for dust aerosol measurement.

58

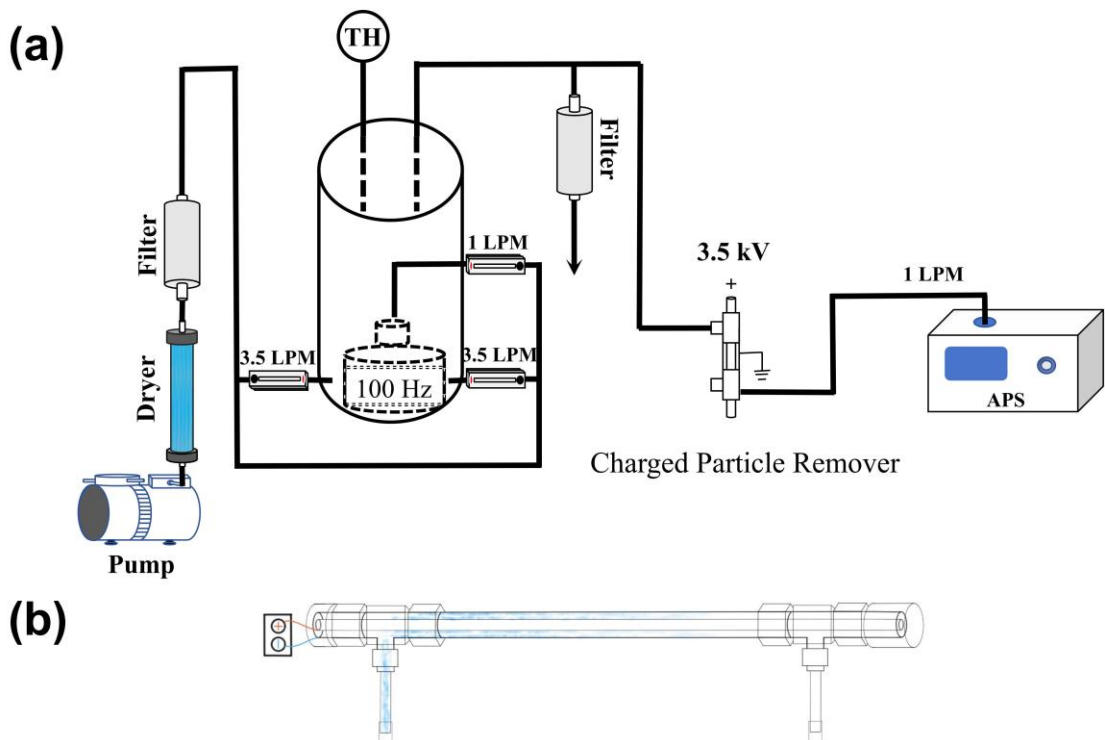

59  
 60 **Figure S2.** Experimental setup for measuring the charged fraction of dust aerosols. (a)  
 61 Schematic of the setup used to measure the charged fraction of dust aerosols. (b)  
 62 Geometry and operating parameters of the Charged Particle Remover (CPR), which  
 63 consists of two coaxially aligned stainless-steel tubes: the inner tube has an outer  
 64 diameter of 6.35 mm and the outer tube has an inner diameter of 14 mm; the length from  
 65 inlet to outlet is 50 mm. The inner and outer tubes are connected to the positive and  
 66 negative terminals of an adjustable high-voltage power supply, respectively.

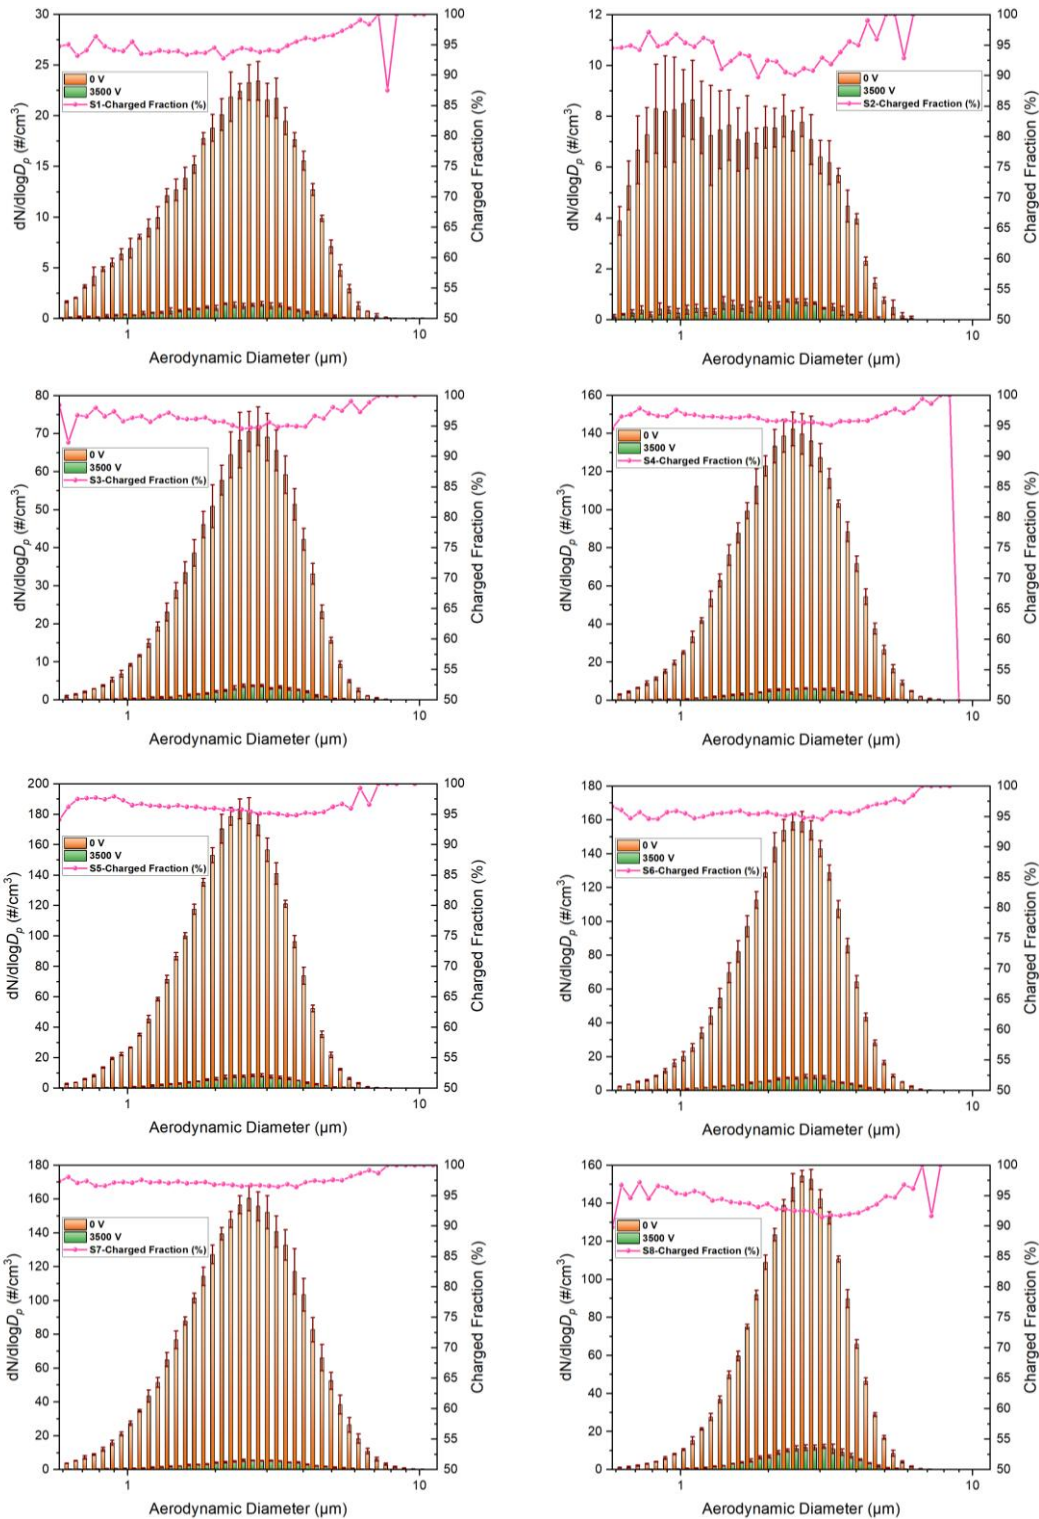

67

68 **Figure S3.** Charged fractions of the eight dust aerosol samples. Green and orange bars  
 69 show the PSDs measured under 0 V and 3500 V, respectively. The pink line denotes the  
 70 charged fraction as a function of aerodynamic diameter (0.5–10  $\mu\text{m}$ ). Sample IDs are  
 71 indicated in the legend.

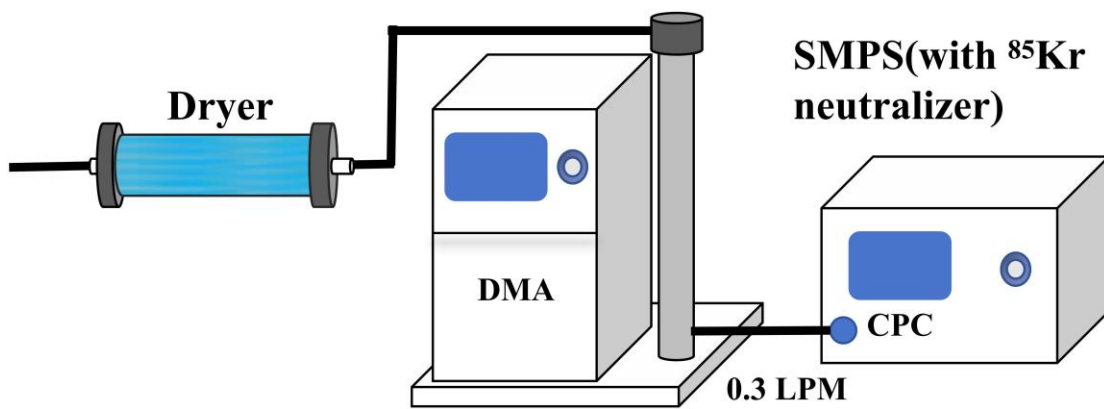

72

73 **Figure S4.** Experimental setup for measuring the electrical mobility diameter of ambient  
74 aerosols.

75

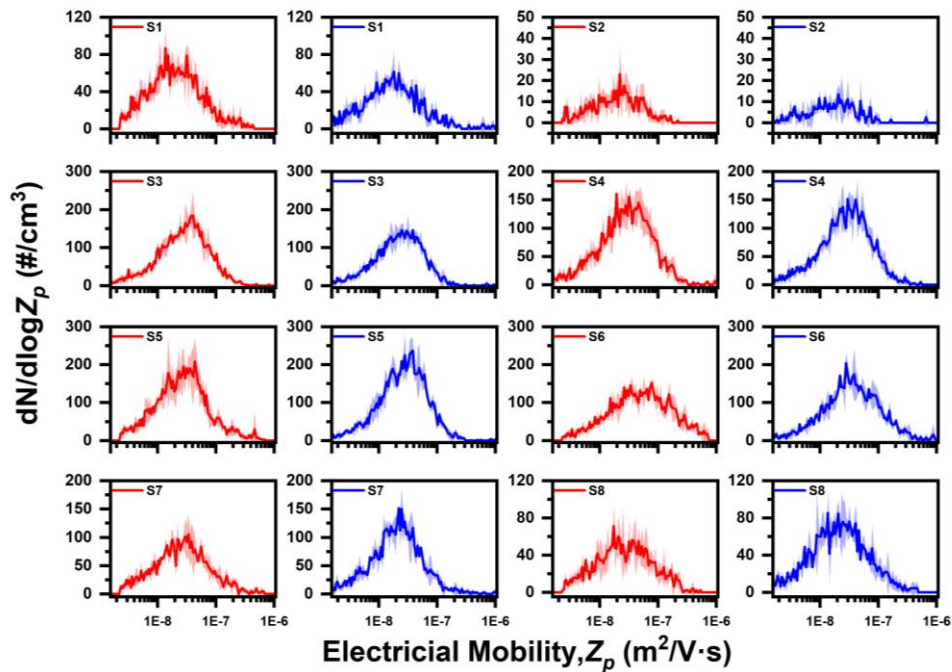

76

77 **Figure S5.** Electrical mobility data for the eight dust aerosol samples. Red indicates  
 78 positively charged particles, and blue indicates negatively charged particles.

79

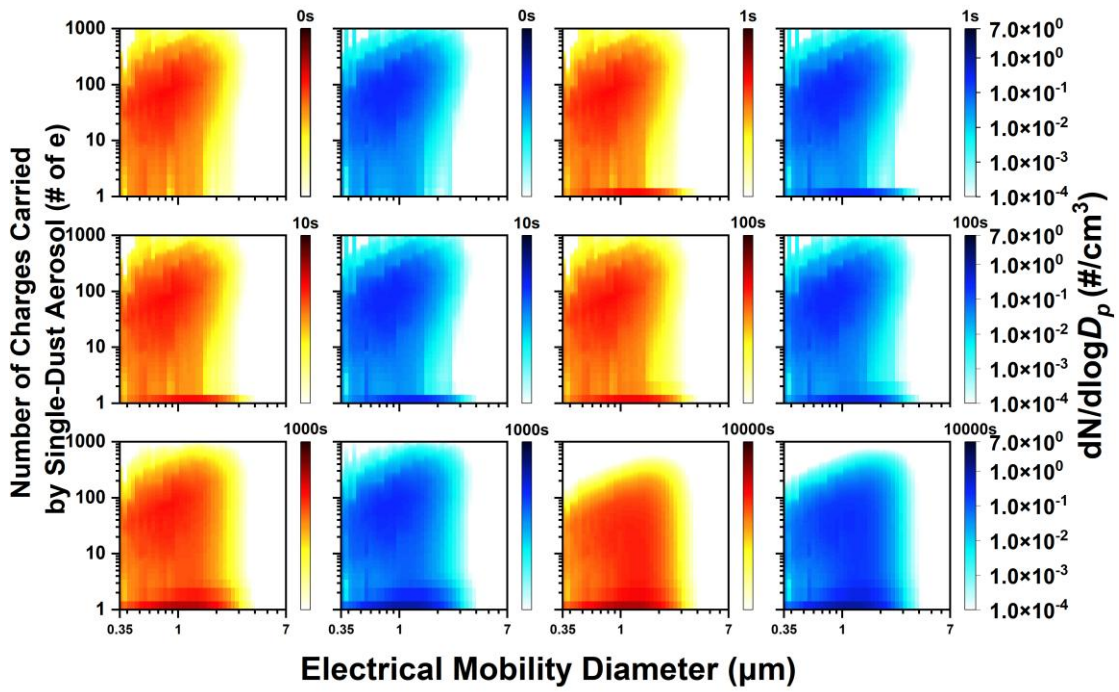

80  
81  
82  
83

**Figure S6.** Evolution of the particle charge distribution during electrostatic coagulation in a dust-only aerosol system at 25 °C with an initial number concentration of 50 #/cm<sup>3</sup>.

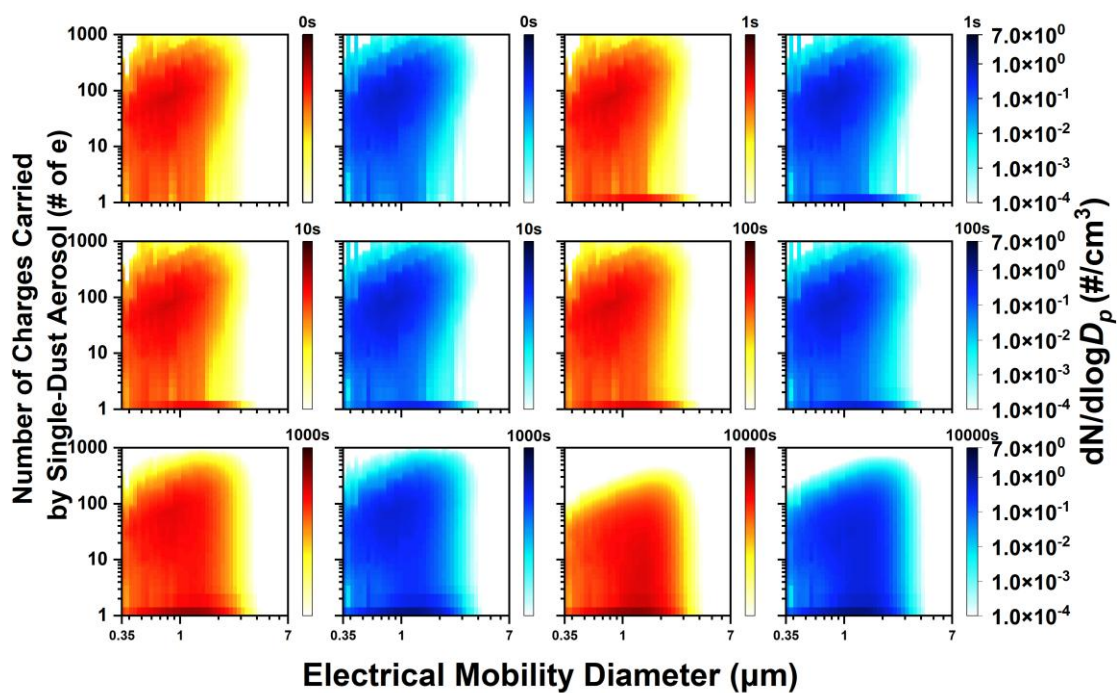

84  
 85 **Figure S7.** Evolution of the particle charge distribution during electrostatic coagulation  
 86 in a dust-only aerosol system at 25 °C with an initial number concentration of 100 #/cm<sup>3</sup>.  
 87

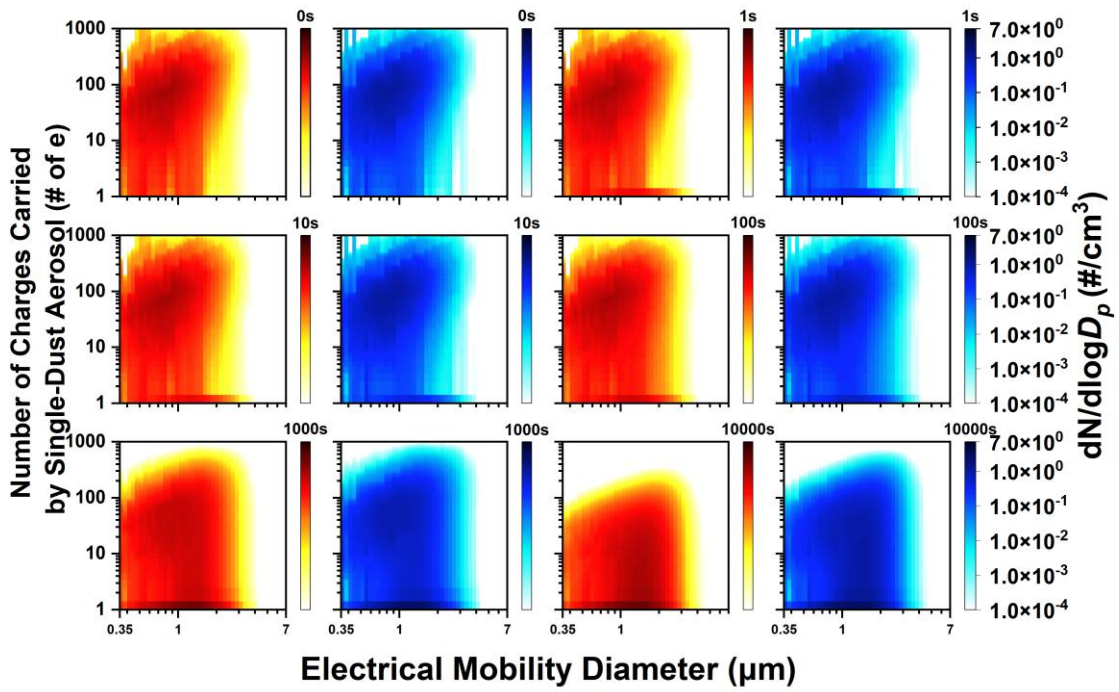

88  
89  
90  
91

**Figure S8.** Evolution of the particle charge distribution during electrostatic coagulation in a dust-only aerosol system at 25 °C with an initial number concentration of 200 #/cm<sup>3</sup>.

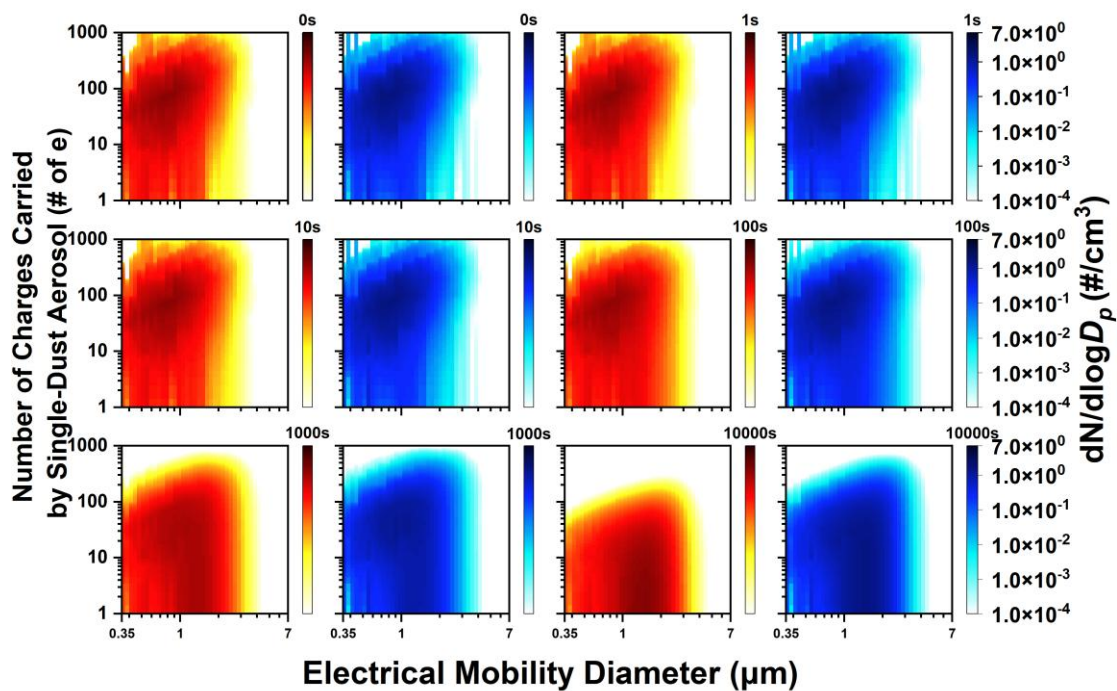

92

93 **Figure S9.** Evolution of the particle charge distribution during electrostatic coagulation  
 94 in a dust-only aerosol system at 25 °C with an initial number concentration of 300 #/cm<sup>3</sup>.

95

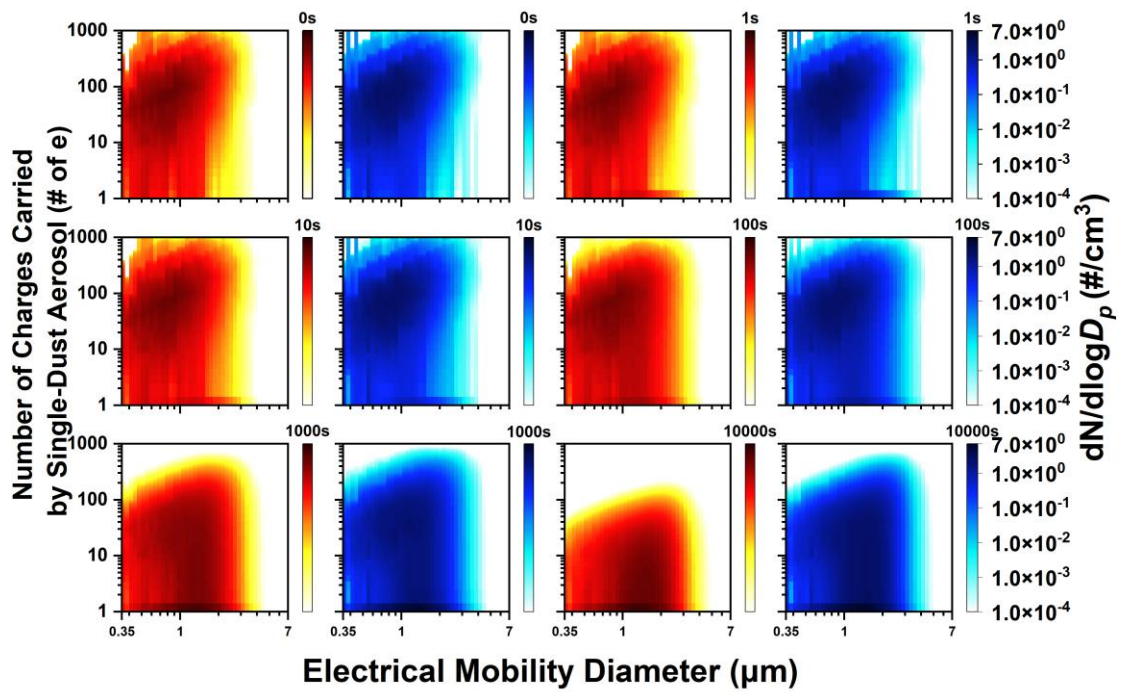

96

97 **Figure S10.** Evolution of the particle charge distribution during electrostatic coagulation  
 98 in a dust-only aerosol system at 25 °C with an initial number concentration of 500 #/cm<sup>3</sup>.

99

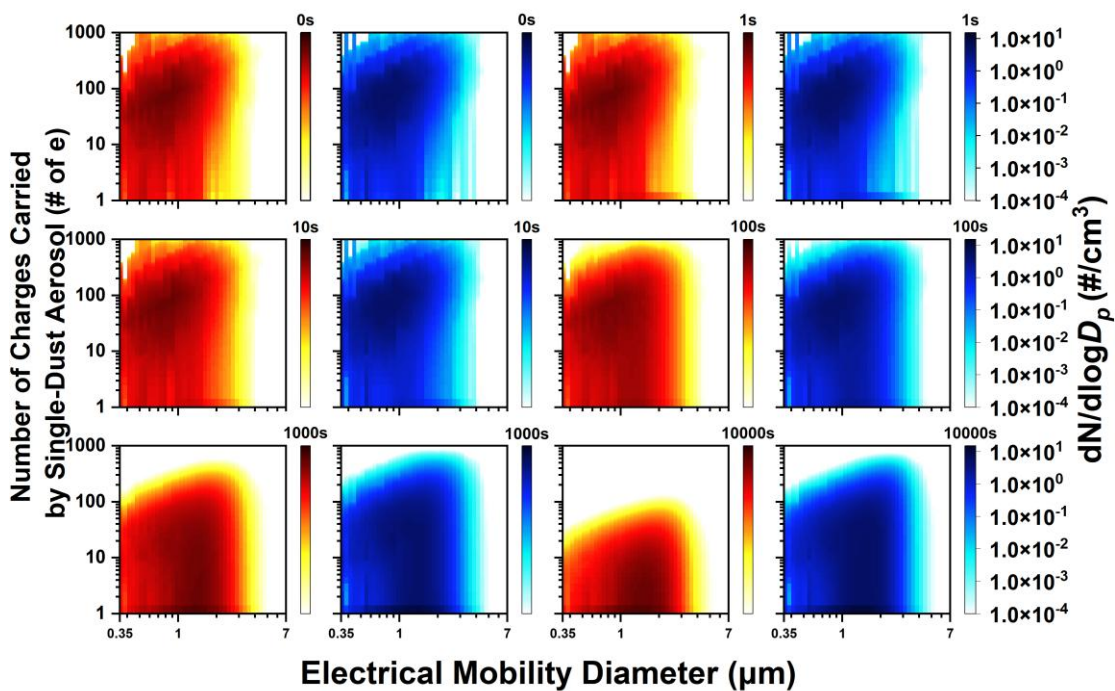

100

101 **Figure S11.** Evolution of the particle charge distribution during electrostatic coagulation  
 102 in a dust-only aerosol system at 25 °C with an initial number concentration of 1000 #/cm<sup>3</sup>.  
 103 The color bar indicates number concentration ( $dN/d\log D_p$ , #/cm<sup>3</sup>) and is capped at 15  
 104 #/cm<sup>3</sup>.

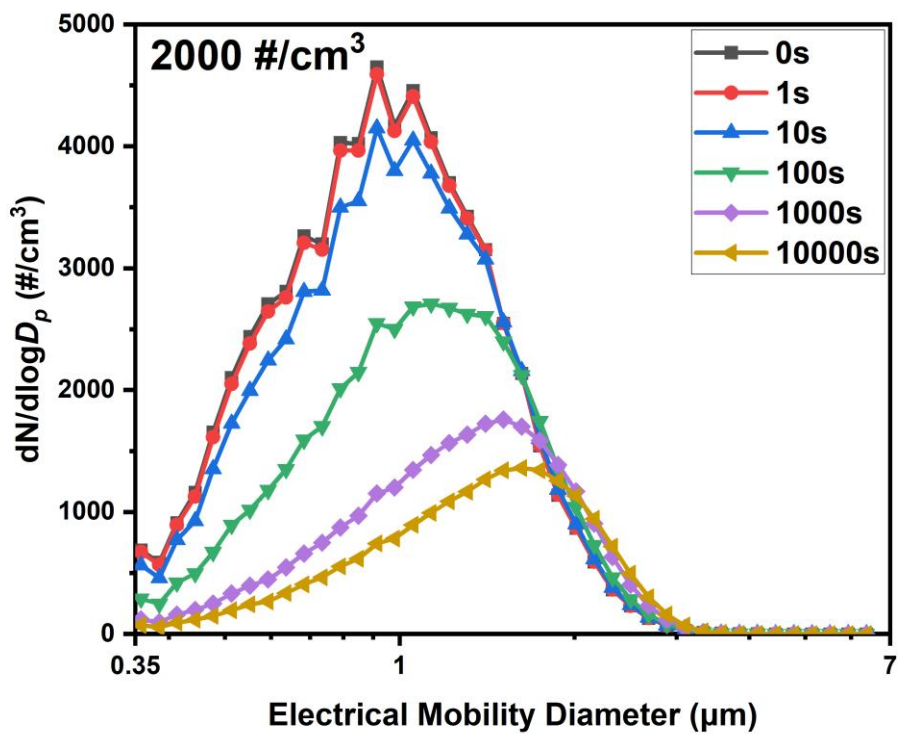

105

106 **Figure S12.** Evolution of the PSD during electrostatic coagulation in a dust-only aerosol  
 107 system at 25 °C with an initial number concentration of 2000 #/cm<sup>3</sup>.

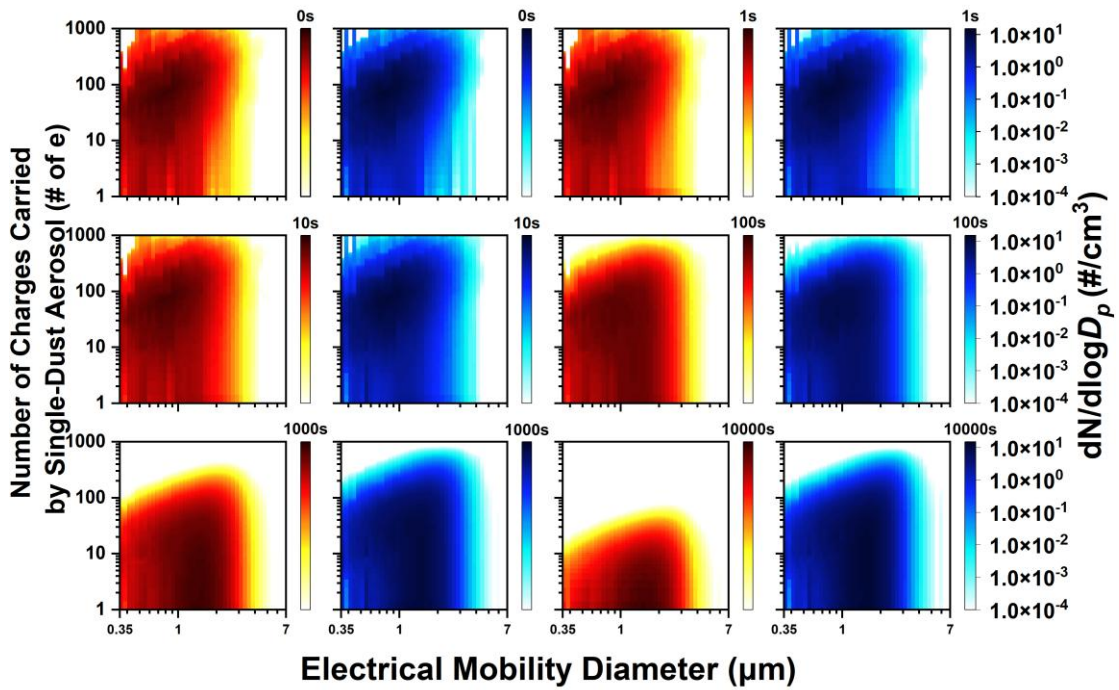

108

109 **Figure S13.** Evolution of the particle charge distribution during electrostatic coagulation  
 110 in a dust-only aerosol system at 25 °C with an initial number concentration of 2000 #/cm<sup>3</sup>.  
 111 The color bar indicates number concentration ( $dN/d\log D_p$ , #/cm<sup>3</sup>) and is capped at 15  
 112 #/cm<sup>3</sup>.

113

114 **Table S1.** Soil sampling locations and soil textures.

| Soils | Location               | Soil Texture    |
|-------|------------------------|-----------------|
| S1    | E 93.8641° N 40.3535°  | sand            |
| S2    | E 94.6694° N 40.0875°  | sand            |
| S3    | E 113.2347° N 41.0082° | loamy sand      |
| S4    | E 113.2245° N 41.0020° | silt loam       |
| S5    | E 111.7782° N 40.9207° | silt loam       |
| S6    | E 120.9210° N 31.0780° | silt loam       |
| S7    | E 121.5277° N 31.3361° | loam            |
| S8    | E 105.2029° N 30.4996° | silty clay loam |

115

116

117 **Table S2.** DMA operating electrical mobility  $Z_p$  set points for selecting dust aerosols  
 118 with specific electrical mobilities.

| No. | $Z_p$<br>( $\text{m}^2 \cdot \text{V}^{-1} \cdot \text{s}^{-1}$ ) | Correspondent<br>aerosol<br>diameter at $Z_p$<br>for a single<br>charge (1e)<br>( $\mu\text{m}$ ) | Charge<br>number<br>below<br>which<br>5% of<br>particle<br>s fall | Corres<br>ponde<br>nt<br>diamet<br>er at<br>5%<br>charge<br>( $\mu\text{m}$ ) | Median<br>charge<br>number | Corres<br>ponde<br>nt<br>diamet<br>er at<br>media<br>n<br>charge<br>( $\mu\text{m}$ ) | Charge<br>number<br>below<br>which<br>95% of<br>particle<br>s fall | Corres<br>ponde<br>nt<br>diamet<br>er at<br>95%<br>charge<br>( $\mu\text{m}$ ) |
|-----|-------------------------------------------------------------------|---------------------------------------------------------------------------------------------------|-------------------------------------------------------------------|-------------------------------------------------------------------------------|----------------------------|---------------------------------------------------------------------------------------|--------------------------------------------------------------------|--------------------------------------------------------------------------------|
| 1   | $4.68 \times 10^{-9}$                                             | 0.197                                                                                             | 4                                                                 | 0.784                                                                         | 9                          | 1.765                                                                                 | 32                                                                 | 6.275                                                                          |
| 2   | $7.83 \times 10^{-9}$                                             | 0.118                                                                                             | 5                                                                 | 0.586                                                                         | 16                         | 1.875                                                                                 | 56                                                                 | 6.563                                                                          |
| 3   | $1.36 \times 10^{-8}$                                             | 0.068                                                                                             | 11                                                                | 0.742                                                                         | 26                         | 1.754                                                                                 | 101                                                                | 6.815                                                                          |
| 4   | $2.48 \times 10^{-8}$                                             | 0.037                                                                                             | 19                                                                | 0.703                                                                         | 50                         | 1.85                                                                                  | 178                                                                | 6.586                                                                          |
| 5   | $4.64 \times 10^{-8}$                                             | 0.02                                                                                              | 37                                                                | 0.732                                                                         | 91                         | 1.8                                                                                   | 334                                                                | 6.605                                                                          |
| 6   | $8.95 \times 10^{-8}$                                             | 0.01                                                                                              | 70                                                                | 0.718                                                                         | 186                        | 1.907                                                                                 | 657                                                                | 6.736                                                                          |
| 7   | $1.76 \times 10^{-7}$                                             | 0.005                                                                                             | 135                                                               | 0.704                                                                         | 340                        | 1.773                                                                                 | 874                                                                | 4.557                                                                          |
| 8   | $3.51 \times 10^{-7}$                                             | 0.003                                                                                             | 299                                                               | 0.782                                                                         | 567                        | 1.482                                                                                 | 932                                                                | 2.437                                                                          |
| 9   | $7.03 \times 10^{-7}$                                             | 0.001                                                                                             | 563                                                               | 0.735                                                                         | 725                        | 0.946                                                                                 | 957                                                                | 1.249                                                                          |

119

120

121 **Table S3.** Ambient particles locations. The sampling inlet was located on the seventh  
122 floor, approximately 20 m above ground level.

| Fine Particulate Matter | Location               |
|-------------------------|------------------------|
| FuDan University        | E 121.5210° N 31.3260° |

123

124

125 **Table S4.** Boltzmann equilibrium charge-state probabilities ( $z = -6$  to  $+6$  e).

| particle Diameter Midpoint, (nm) | Mobility Midpoint $m^2/v \cdot s$ | Fraction of Total Particle Concentration That Carries This Number (-6 to +6) of Charges |         |         |         |         |         |         |         |         |         |         |         |         |  |
|----------------------------------|-----------------------------------|-----------------------------------------------------------------------------------------|---------|---------|---------|---------|---------|---------|---------|---------|---------|---------|---------|---------|--|
|                                  |                                   | -6                                                                                      | -5      | -4      | -3      | -2      | -1      | 0       | +1      | +2      | +3      | +4      | +5      | +6      |  |
| 14.33                            | 1.03E-02                          | 0                                                                                       | 0       | 0       | 0       | 0       | 0.07740 | 0.86198 | 0.06060 | 0       | 0       | 0       | 0       | 0       |  |
| 16.55                            | 7.77E-03                          | 0                                                                                       | 0       | 0       | 0       | 0       | 0.09030 | 0.83938 | 0.07030 | 0       | 0       | 0       | 0       | 0       |  |
| 19.11                            | 5.86E-03                          | 0                                                                                       | 0       | 0       | 0       | 0       | 0.10470 | 0.81425 | 0.08100 | 0       | 0       | 0       | 0       | 0       |  |
| 22.07                            | 4.43E-03                          | 0                                                                                       | 0       | 0       | 0       | 0.00040 | 0.12050 | 0.78618 | 0.09280 | 0.00020 | 0       | 0       | 0       | 0       |  |
| 25.48                            | 3.35E-03                          | 0                                                                                       | 0       | 0       | 0       | 0.00080 | 0.13750 | 0.75588 | 0.10540 | 0.00040 | 0       | 0       | 0       | 0       |  |
| 29.43                            | 2.54E-03                          | 0                                                                                       | 0       | 0       | 0       | 0.00150 | 0.15540 | 0.72334 | 0.11880 | 0.00090 | 0       | 0       | 0       | 0       |  |
| 33.98                            | 1.93E-03                          | 0                                                                                       | 0       | 0       | 0       | 0.00290 | 0.17390 | 0.68883 | 0.13270 | 0.00170 | 0       | 0       | 0       | 0       |  |
| 39.24                            | 1.47E-03                          | 0                                                                                       | 0       | 0       | 0       | 0.00510 | 0.19260 | 0.65272 | 0.14670 | 0.00290 | 0       | 0       | 0       | 0       |  |
| 45.32                            | 1.12E-03                          | 0                                                                                       | 0       | 0       | 0       | 0.00840 | 0.21090 | 0.61545 | 0.16050 | 0.00480 | 0       | 0       | 0       | 0       |  |
| 52.33                            | 8.53E-04                          | 0                                                                                       | 0       | 0       | 0       | 0.01310 | 0.22820 | 0.57755 | 0.17370 | 0.00750 | 0       | 0       | 0       | 0       |  |
| 60.43                            | 6.54E-04                          | 0                                                                                       | 0       | 0       | 0       | 0.01950 | 0.24400 | 0.53969 | 0.18570 | 0.01110 | 0       | 0       | 0       | 0       |  |
| 69.78                            | 5.03E-04                          | 0                                                                                       | 0       | 0       | 0       | 0.02780 | 0.25760 | 0.50260 | 0.19630 | 0.01570 | 0       | 0       | 0       | 0       |  |
| 80.58                            | 3.89E-04                          | 0                                                                                       | 0       | 0       | 0.00120 | 0.03790 | 0.26860 | 0.46539 | 0.20500 | 0.02130 | 0.00050 | 0       | 0       | 0       |  |
| 93.06                            | 3.01E-04                          | 0                                                                                       | 0       | 0       | 0.00260 | 0.04970 | 0.27660 | 0.43040 | 0.21150 | 0.02800 | 0.00120 | 0       | 0       | 0       |  |
| 107.46                           | 2.35E-04                          | 0                                                                                       | 0       | 0.00010 | 0.00510 | 0.06280 | 0.28120 | 0.39728 | 0.21550 | 0.03560 | 0.00230 | 0       | 0       | 0       |  |
| 124.09                           | 1.84E-04                          | 0                                                                                       | 0       | 0.00040 | 0.00910 | 0.07670 | 0.28250 | 0.36632 | 0.21690 | 0.04390 | 0.00410 | 0.00010 | 0       | 0       |  |
| 143.3                            | 1.45E-04                          | 0                                                                                       | 0       | 0.00100 | 0.01460 | 0.09090 | 0.28040 | 0.33774 | 0.21580 | 0.05250 | 0.00660 | 0.00040 | 0       | 0       |  |
| 165.48                           | 1.15E-04                          | 0                                                                                       | 0.00010 | 0.00230 | 0.02200 | 0.10470 | 0.27510 | 0.31172 | 0.21220 | 0.06120 | 0.00990 | 0.00080 | 0       | 0       |  |
| 191.1                            | 9.23E-05                          | 0                                                                                       | 0.00030 | 0.00440 | 0.03090 | 0.11740 | 0.26710 | 0.28841 | 0.20650 | 0.06940 | 0.01390 | 0.00150 | 0.00010 | 0       |  |
| 220.67                           | 7.43E-05                          | 0.00010                                                                                 | 0.00090 | 0.00770 | 0.04110 | 0.12850 | 0.25680 | 0.26786 | 0.19890 | 0.07680 | 0.01850 | 0.00260 | 0.00020 | 0       |  |
| 254.83                           | 6.02E-05                          | 0.00020                                                                                 | 0.00190 | 0.01250 | 0.05220 | 0.13760 | 0.24480 | 0.25006 | 0.18980 | 0.08290 | 0.02340 | 0.00430 | 0.00050 | 0       |  |
| 294.27                           | 4.91E-05                          | 0.00050                                                                                 | 0.00370 | 0.01870 | 0.06340 | 0.14430 | 0.23160 | 0.23483 | 0.17970 | 0.08730 | 0.02840 | 0.00640 | 0.00100 | 0.00010 |  |
| 339.82                           | 4.04E-05                          | 0.00120                                                                                 | 0.00660 | 0.02620 | 0.07420 | 0.14860 | 0.21780 | 0.22184 | 0.16900 | 0.09010 | 0.03330 | 0.00900 | 0.00170 | 0.00020 |  |
| 392.42                           | 3.34E-05                          | 0.00250                                                                                 | 0.01080 | 0.03480 | 0.08420 | 0.15050 | 0.20390 | 0.21058 | 0.15810 | 0.09100 | 0.03780 | 0.01200 | 0.00280 | 0.00050 |  |
| 453.16                           | 2.77E-05                          | 0.00460                                                                                 | 0.01620 | 0.04400 | 0.09290 | 0.15030 | 0.19040 | 0.20035 | 0.14740 | 0.09030 | 0.04170 | 0.01510 | 0.00430 | 0.00090 |  |
| 523.3                            | 2.32E-05                          | 0.00790                                                                                 | 0.02290 | 0.05340 | 0.10010 | 0.14810 | 0.17770 | 0.19035 | 0.13720 | 0.08830 | 0.04490 | 0.01830 | 0.00600 | 0.00160 |  |
| 604.3                            | 1.94E-05                          | 0.01230                                                                                 | 0.03050 | 0.06230 | 0.10560 | 0.14450 | 0.16610 | 0.17970 | 0.12780 | 0.08540 | 0.04740 | 0.02140 | 0.00800 | 0.00250 |  |
| 697.83                           | 1.63E-05                          | 0.01800                                                                                 | 0.03860 | 0.07050 | 0.10930 | 0.13980 | 0.15600 | 0.16748 | 0.11940 | 0.08210 | 0.04900 | 0.02420 | 0.01020 | 0.00360 |  |
| 805.84                           | 1.38E-05                          | 0.02460                                                                                 | 0.04690 | 0.07750 | 0.11130 | 0.13450 | 0.14750 | 0.15282 | 0.11210 | 0.07890 | 0.04990 | 0.02660 | 0.01230 | 0.00500 |  |

126

127 The equation is as follows:

128 
$$f(N) = 10^{\left[ \sum_{i=0}^5 a_i(N) \left( \log \frac{D_p}{nm} \right)^i \right]}$$
 (1)

129 Applicable aerosols size range:

130 
$$1 \text{ nm} \leq D_p \leq 1000 \text{ nm for } N = -1, 0, 1$$

131 
$$20 \text{ nm} \leq D_p \leq 1000 \text{ nm for } N = -2, 2$$

| $a_i(N)$ | $N=-2$   | $N=-1$  | $N=0$   | $N=1$   | $N=2$    |
|----------|----------|---------|---------|---------|----------|
| $a_0$    | -26.3328 | -2.3197 | -0.0003 | -2.3484 | -44.4756 |
| $a_1$    | 35.9044  | 0.6175  | -0.1014 | 0.6044  | 79.3772  |
| $a_2$    | -21.4608 | 0.6201  | 0.3073  | 0.4800  | -62.8900 |
| $a_3$    | 7.0867   | -0.1105 | -0.3372 | 0.0013  | 26.4492  |
| $a_4$    | -1.3088  | -0.1260 | 0.1023  | -0.1553 | -5.7480  |
| $a_5$    | 0.1051   | 0.0297  | -0.0105 | 0.0320  | 0.5049   |

132 For the fraction of particles carrying three or more charges, use Equation which is based  
133 on a derivation by Gunn from 1956:

134

$$f(N) = \frac{e}{\sqrt{4\pi^2 \varepsilon_0 D_p k T}} \exp \frac{-[N - \frac{2\pi \varepsilon_0 D_p k T}{e^2} \ln(\frac{Z_{i+}}{Z_{i-}})]^2}{2 \frac{2\pi \varepsilon_0 D_p k T}{e^2}} \quad (2)$$

135 Where  $e$  ( $1.60217733 \times 10^{-19}$  C) is elementary charge,  $\varepsilon_0$  ( $8.854187817 \times 10^{-12}$  F/m) is  
136 dielectric constant,  $D_p$  (m) is electrical mobility diameter,  $T$  (K) is Temperature,  $N$  is  
137 number of elementary charge units,  $\frac{Z_{i+}}{Z_{i-}}$  (0.875, Wiedensohler, A. 1988) is ion mobility  
138 ratio.

139

140 **Table S5.** Size-bin edges (sorted in ascending order by column)

| Background (non-dust) ambient aerosol size-bin edges (14.1–346 nm; 90 edges) |  |      |  |       |  |       |  |       |
|------------------------------------------------------------------------------|--|------|--|-------|--|-------|--|-------|
| 14.1                                                                         |  | 31.1 |  | 68.5  |  | 151.2 |  | 333.8 |
| 14.6                                                                         |  | 32.2 |  | 71    |  | 156.8 |  | 346   |
| 15.1                                                                         |  | 33.4 |  | 73.7  |  | 162.5 |  |       |
| 15.7                                                                         |  | 34.6 |  | 76.4  |  | 168.5 |  |       |
| 16.3                                                                         |  | 35.9 |  | 79.1  |  | 174.7 |  |       |
| 16.8                                                                         |  | 37.2 |  | 82    |  | 181.1 |  |       |
| 17.5                                                                         |  | 38.5 |  | 85.1  |  | 187.7 |  |       |
| 18.1                                                                         |  | 40   |  | 88.2  |  | 194.6 |  |       |
| 18.8                                                                         |  | 41.4 |  | 91.4  |  | 201.7 |  |       |
| 19.5                                                                         |  | 42.9 |  | 94.7  |  | 209.1 |  |       |
| 20.2                                                                         |  | 44.5 |  | 98.2  |  | 216.7 |  |       |
| 20.9                                                                         |  | 46.1 |  | 101.8 |  | 224.7 |  |       |
| 21.7                                                                         |  | 47.8 |  | 105.5 |  | 232.9 |  |       |
| 22.5                                                                         |  | 49.6 |  | 109.4 |  | 241.4 |  |       |
| 23.3                                                                         |  | 51.4 |  | 113.4 |  | 250.3 |  |       |
| 24.1                                                                         |  | 53.3 |  | 117.6 |  | 259.5 |  |       |
| 25                                                                           |  | 55.2 |  | 121.9 |  | 269   |  |       |
| 25.9                                                                         |  | 57.3 |  | 126.3 |  | 278.8 |  |       |
| 26.9                                                                         |  | 59.4 |  | 131   |  | 289   |  |       |
| 27.9                                                                         |  | 61.5 |  | 135.8 |  | 299.6 |  |       |
| 28.9                                                                         |  | 63.8 |  | 140.7 |  | 310.6 |  |       |
| 30                                                                           |  | 66.1 |  | 145.9 |  | 322   |  |       |

| Dust aerosol size-bin edges (0.358–6.37 $\mu\text{m}$ ; 41 edges). |  |       |  |       |  |       |  |       |
|--------------------------------------------------------------------|--|-------|--|-------|--|-------|--|-------|
| 0.358                                                              |  | 0.684 |  | 1.308 |  | 2.499 |  | 4.776 |
| 0.385                                                              |  | 0.735 |  | 1.406 |  | 2.685 |  | 5.132 |
| 0.413                                                              |  | 0.79  |  | 1.51  |  | 2.886 |  | 5.515 |
| 0.444                                                              |  | 0.849 |  | 1.623 |  | 3.101 |  | 5.926 |
| 0.477                                                              |  | 0.913 |  | 1.744 |  | 3.333 |  | 6.37  |
| 0.513                                                              |  | 0.98  |  | 1.874 |  | 3.581 |  |       |
| 0.552                                                              |  | 1.054 |  | 2.014 |  | 3.848 |  |       |
| 0.593                                                              |  | 1.132 |  | 2.164 |  | 4.135 |  |       |
| 0.637                                                              |  | 1.217 |  | 2.326 |  | 4.444 |  |       |

142
